# Supplementary material for: Protective anti‐prion antibodies in human immunoglobulin repertoires
Source: PubMed Central journal article supplement (PMC7506995; doi:10.15252/emmm.202012739), 2020-08-10
Supplement: EMMM-12-e12739-s001.pdf [file EMMM-12-e12739-s001.pdf]

## **Appendix information**

### **Table of content:**

- 1. Appendix Figure S1**
- 2. Appendix Figure S2**
- 3. Appendix Figure S3**
- 4. Appendix Figure S4**
- 5. Appendix Figure legends**
- 6. Appendix Table S1**
- 7. Appendix Table S2**
- 8. Appendix Table S3**
- 9. Appendix Table S4**
- 10. Appendix Table S5**
- 11. Appendix Table S6 (exact p-values)**

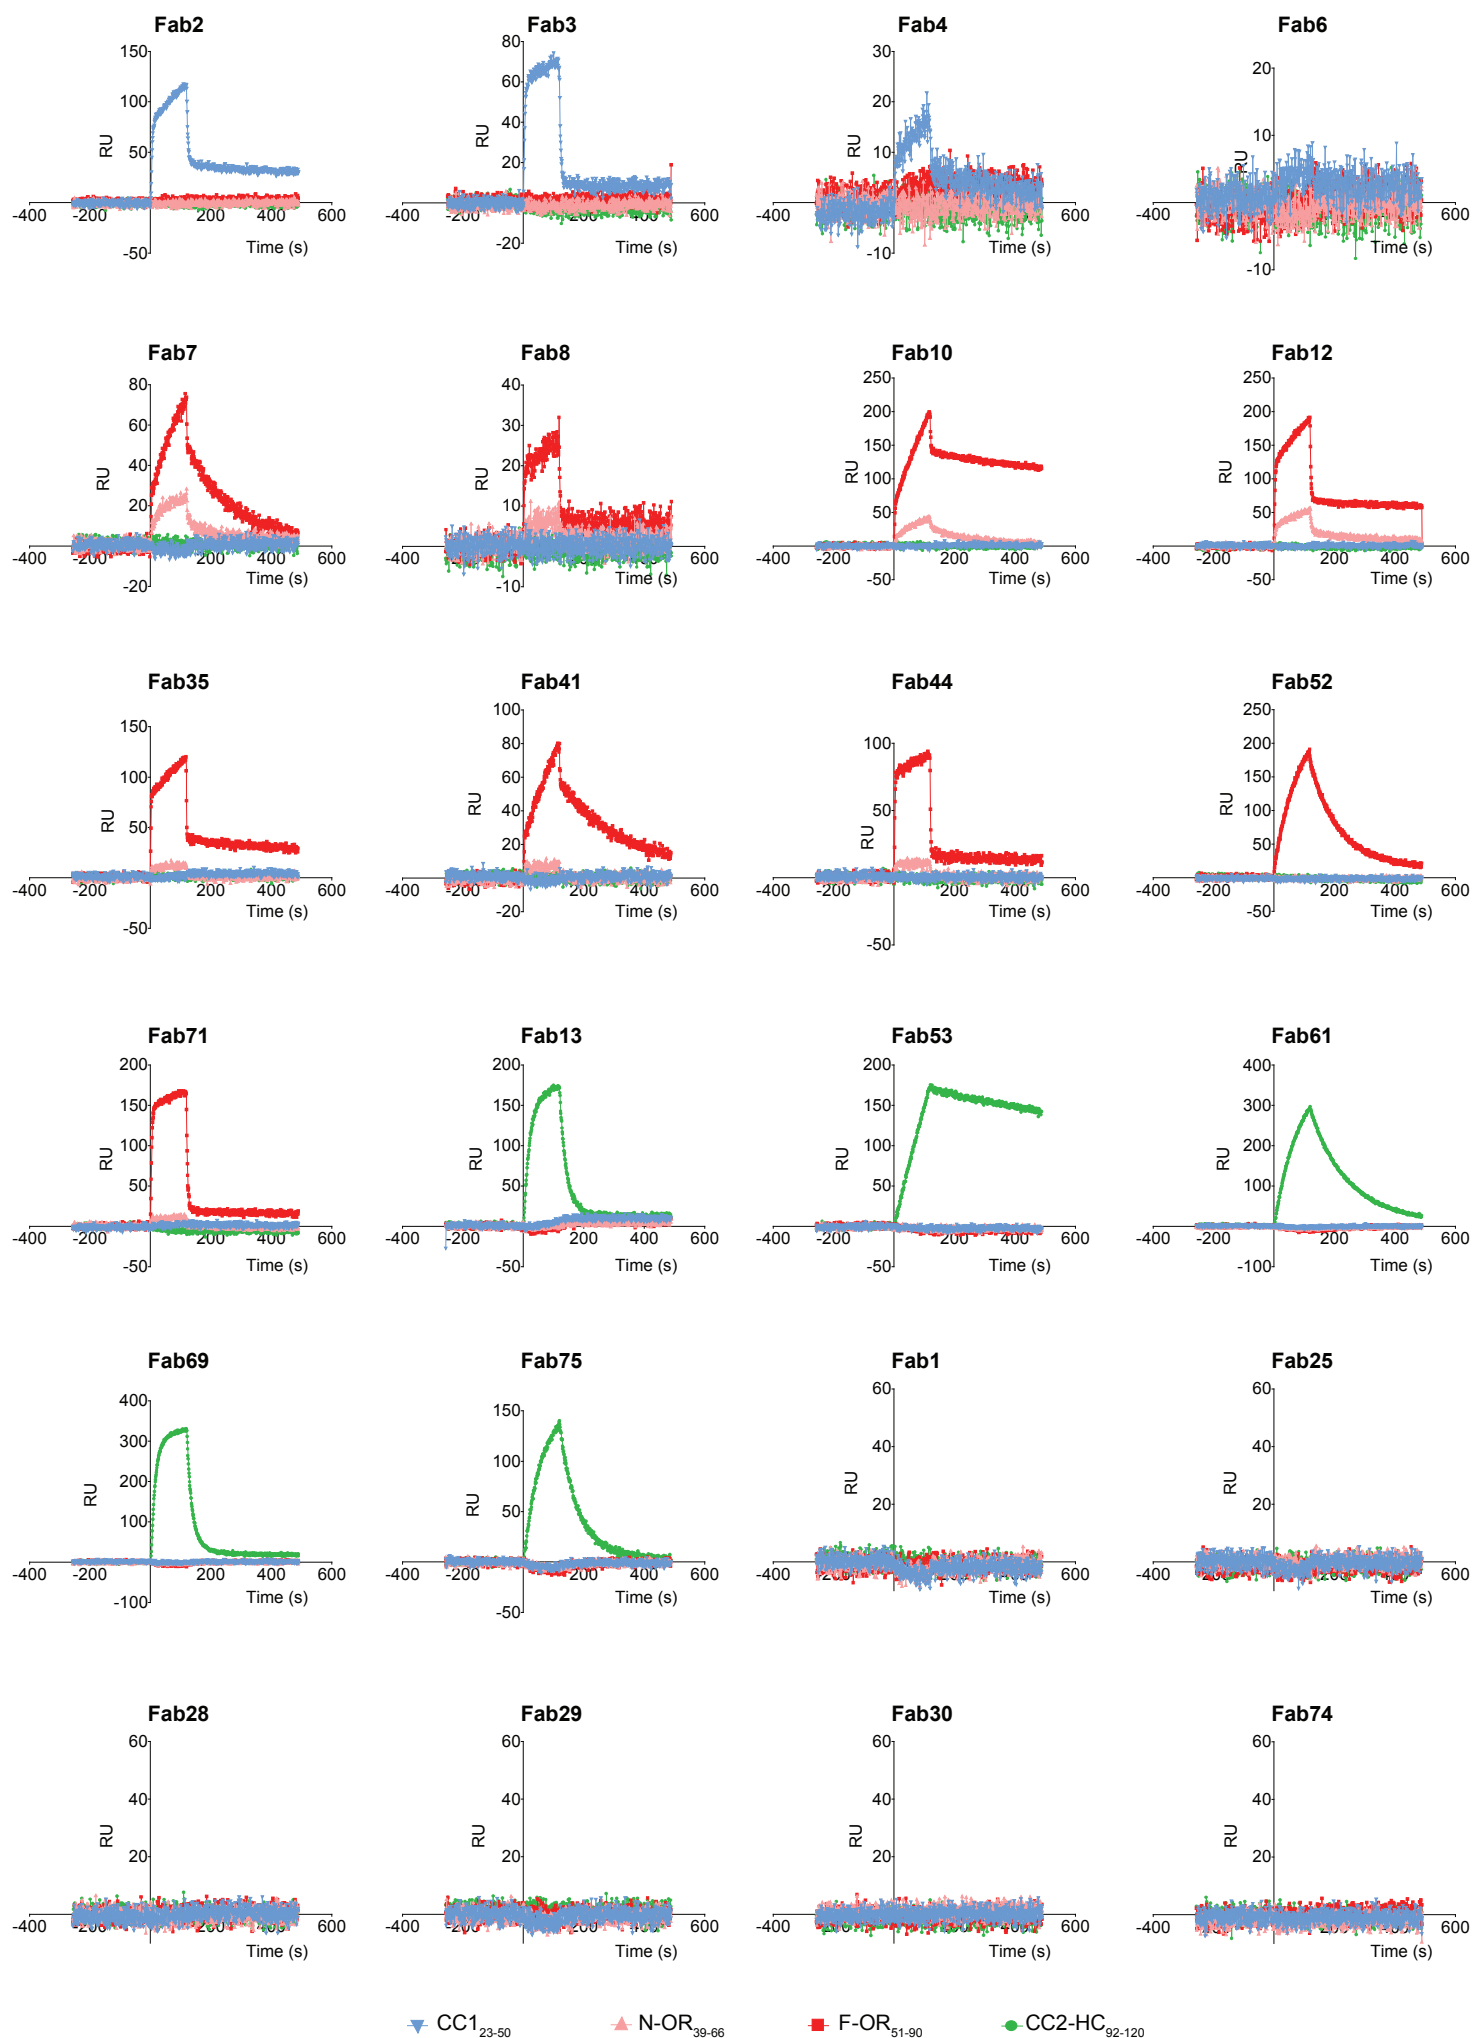

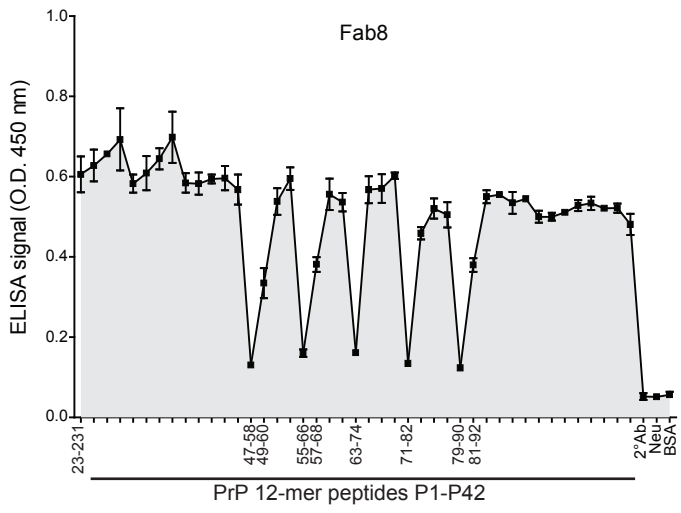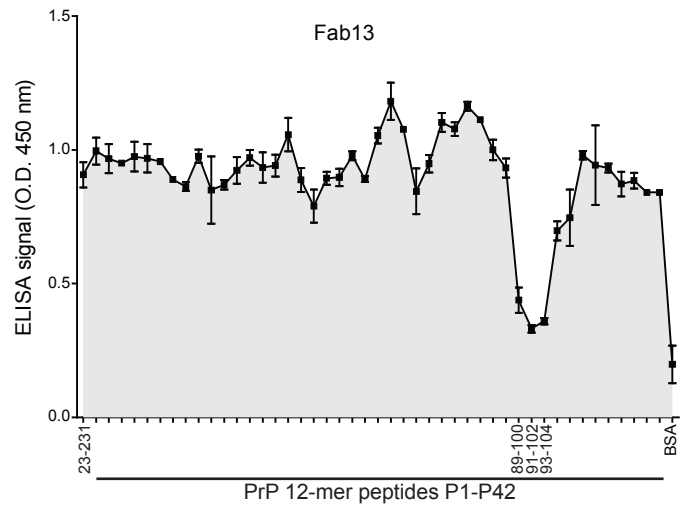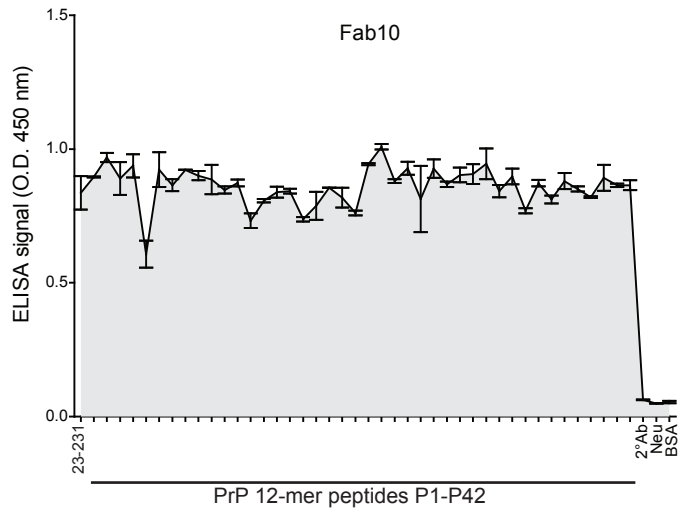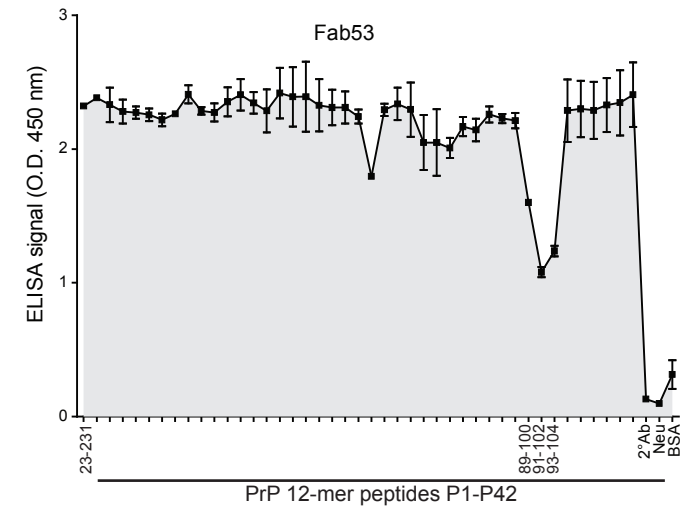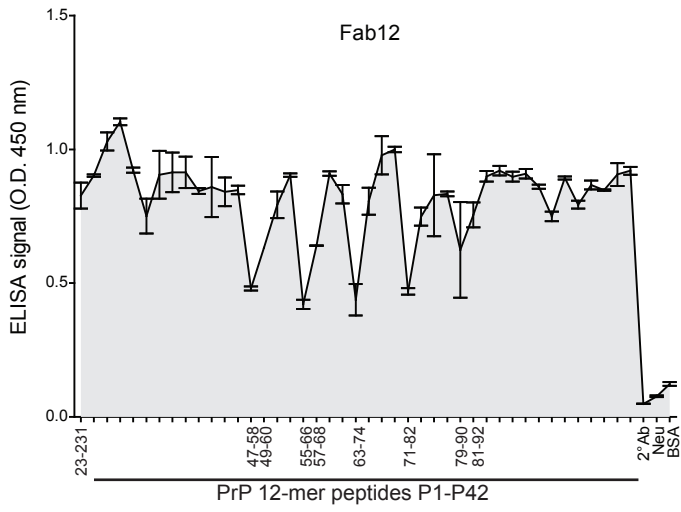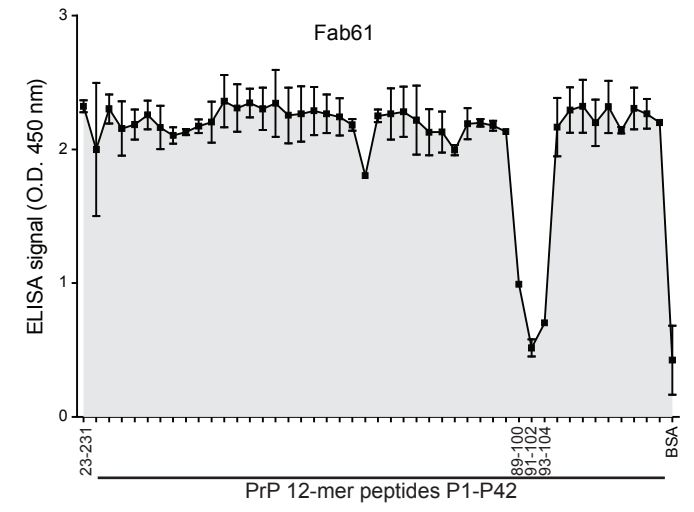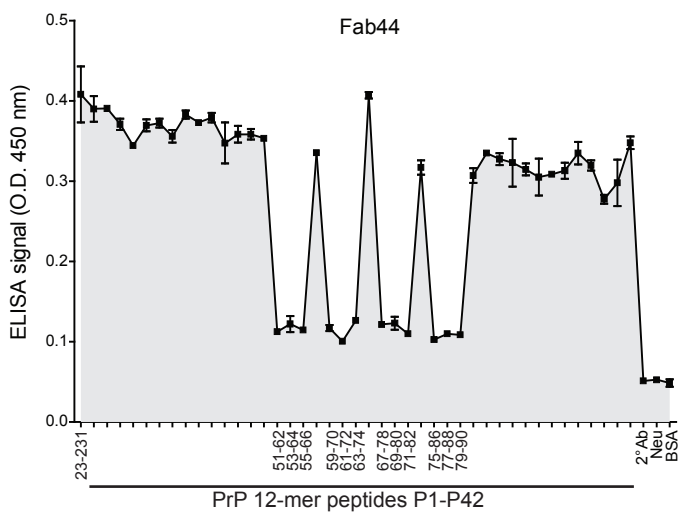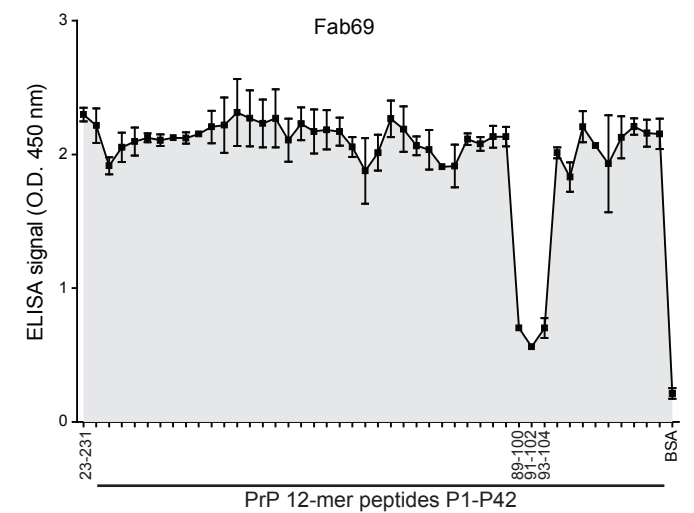

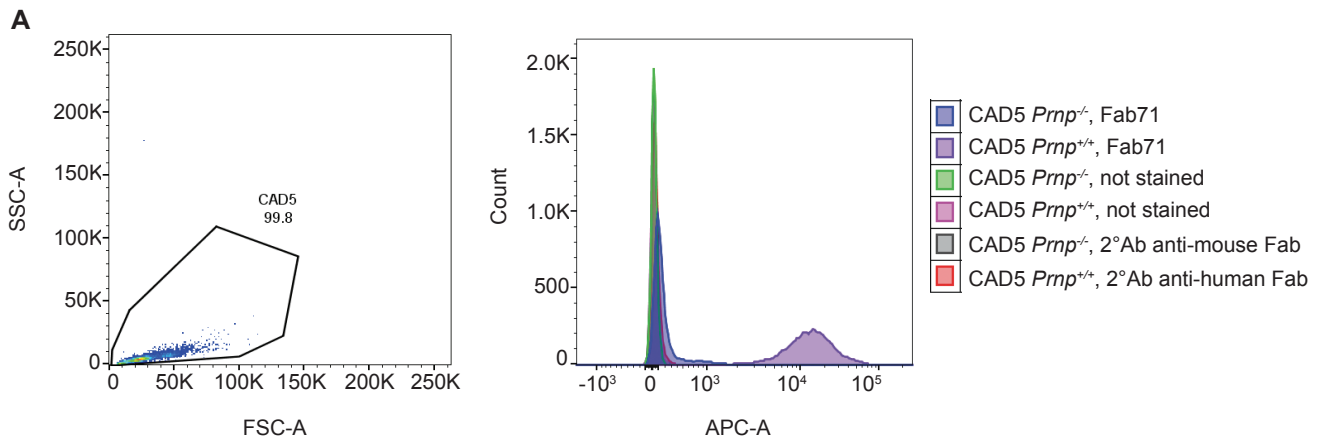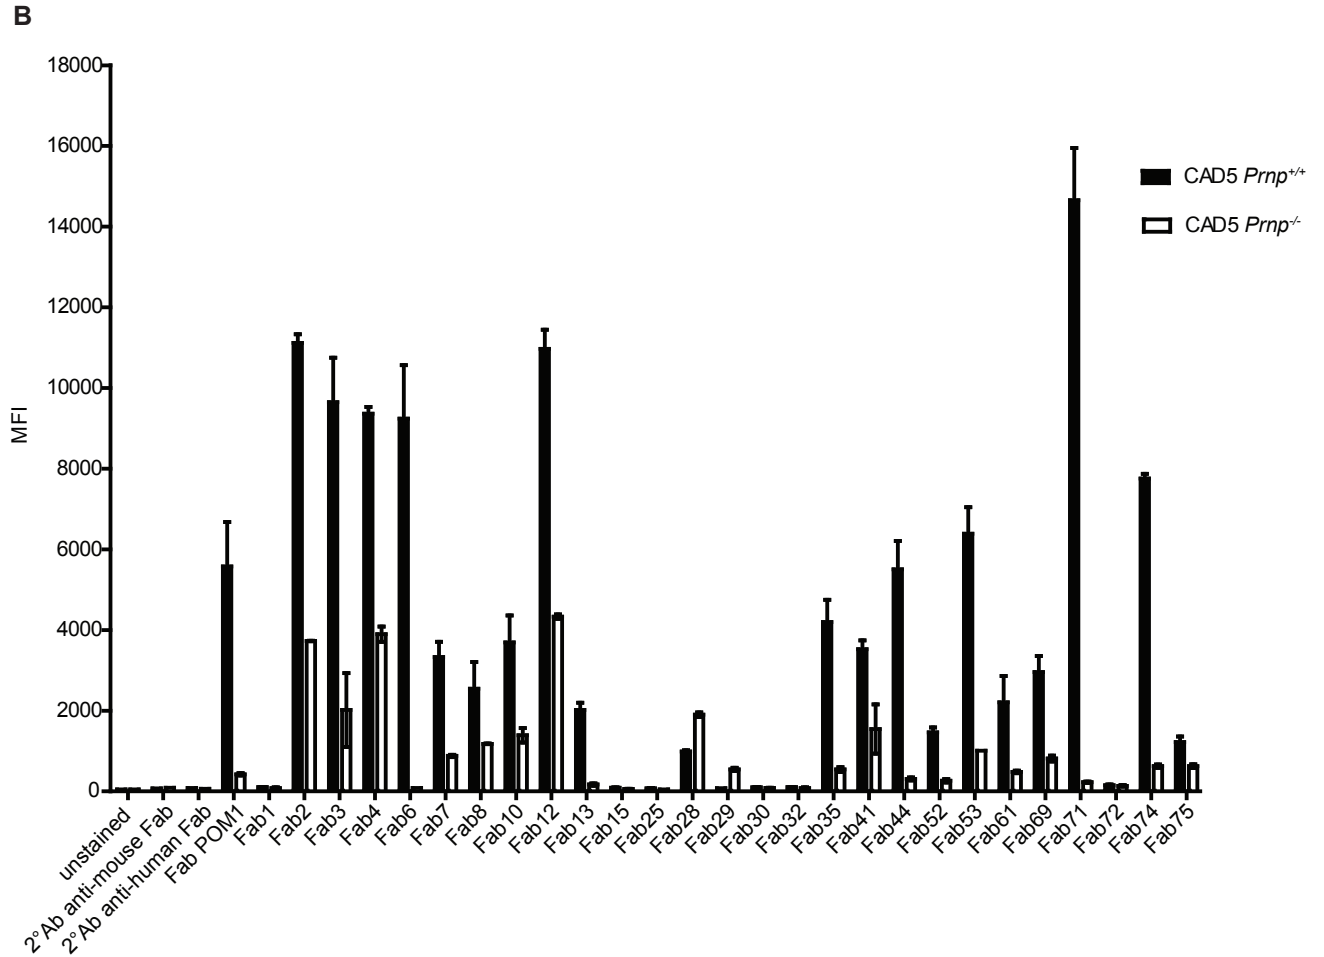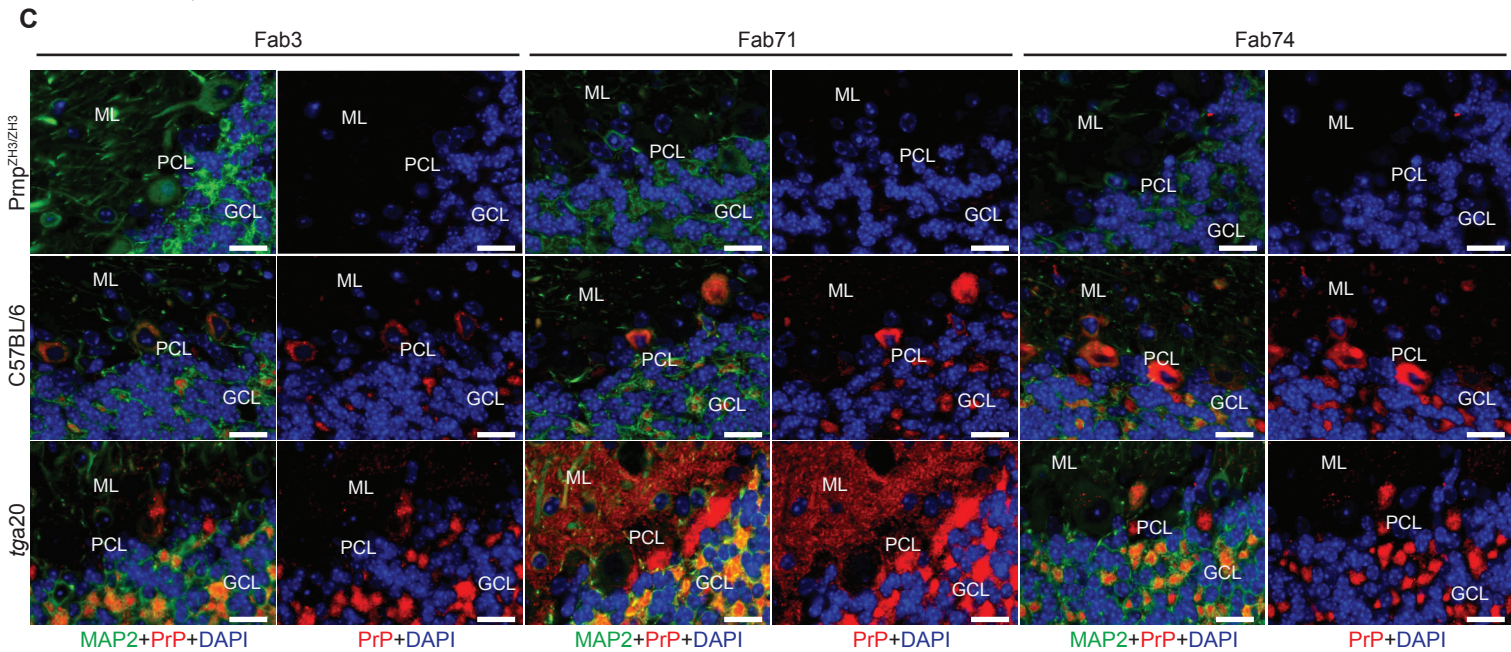

**A**

Source of all samples

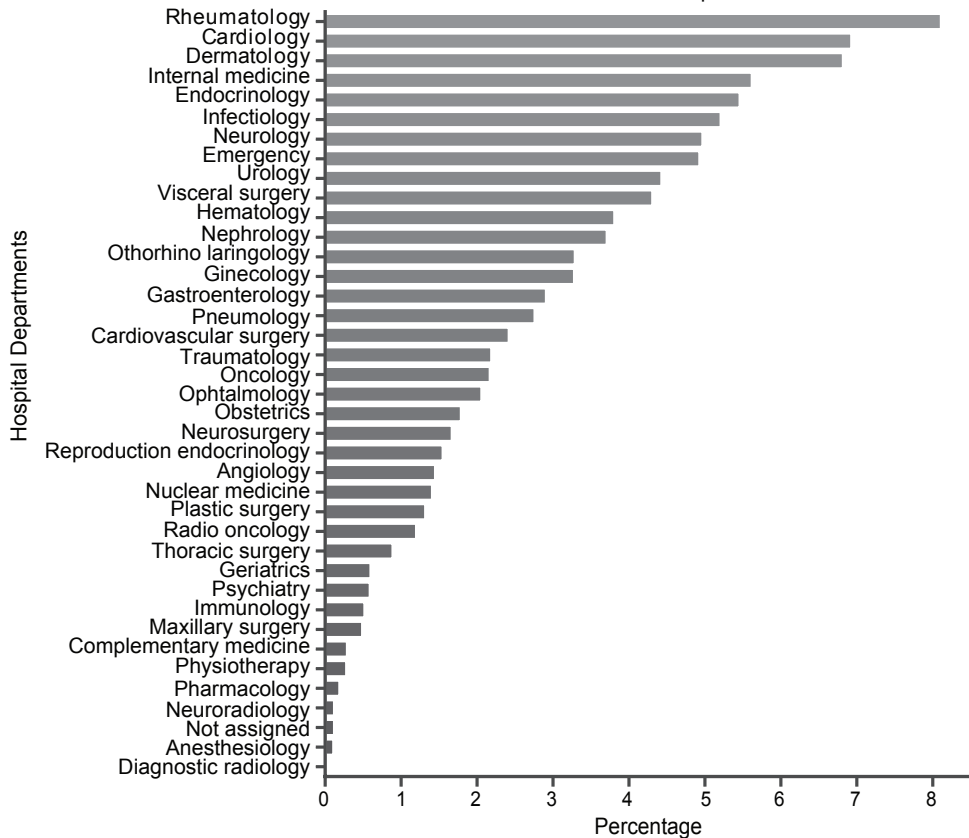**B**

-logEC50 versus age of all hits

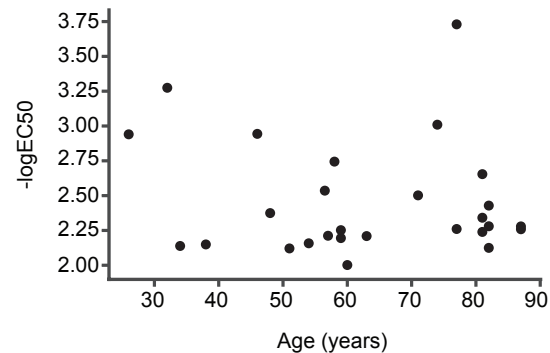**C**

-logEC50 distribution of hit males and females

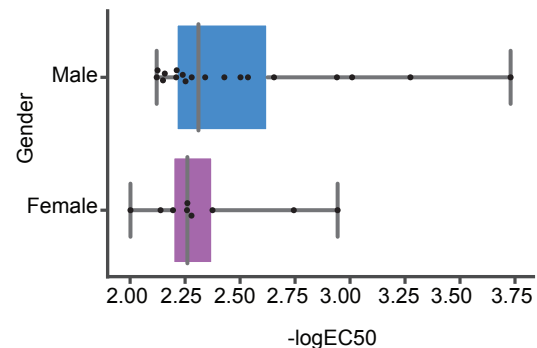

**Appendix figure legends**

**Appendix Fig. S1: Epitope confirmation by SPR.** Biotinylated PrP peptides were immobilized on an NLC sensor chip and the binding of the indicated Fabs was measured by SPR. Epitope assessment by SPR confirmed the results obtained by ELISA. RU: relative units.

**Appendix Fig. S2: Epitope mapping by competition ELISA.** FT-competition ELISA to map the epitopes of the OR<sub>51-91</sub> binders (Fab8, Fab10, Fab44, Fab12) and CC2-HC<sub>92-120</sub> binders (Fab13, Fab53, Fab61, Fab69). Peptides that strongly inhibit the binding of the Fabs to recPrP<sub>23-231</sub> are indicated by their residue numbers in the PrP sequence and reflect the respective binding epitopes. Positive control: recPrP<sub>23-231</sub>. Negative controls: Neu, BSA, and 2° Ab.

Data information: ELISA data were performed in duplicates. Data represent the mean ± sem.

**Appendix Fig. S3: Anti-PrP Fabs detect cell surface exposed wtPrP<sup>C</sup> and stain wtPrP<sup>C</sup> in paraffin embedded mouse brain sections.**

**(A)** Flow cytometry analysis of the Fabs compared to Fab-POM1 used as positive control for the staining. CAD5 *Prnp*<sup>+/+</sup> and *Prnp*<sup>-/-</sup> cells were incubated with the Fabs at 150 µg/ml, and analyzed with an APC-labelled anti-human Fab antibody. Representative flow cytometry dot plot of FSC-A (forward scatter)/SSC-A (side scatter) of CAD5 *Prnp*<sup>+/+</sup> stained with Fab71 (left) and fluorescence intensity plot of CAD5 *Prnp*<sup>+/+</sup> and *Prnp*<sup>-/-</sup> cells.

**(B)** Bar graph showing the average mean fluorescent intensity (MFI) for each Fab. Increased MFIs indicate binding of the Fabs to wtPrP<sup>C</sup> on the cell surface. Each Fab was tested in duplicate.

Data information: Data represent the mean ± sem.

**(C)** Immunofluorescent staining of cerebellar brain sections of *Prnp*<sup>ZH3/ZH3</sup>, wt and *tga20* mice with either Fab3, Fab71, or Fab74 (displayed in red). Anti-MAP2 antibody (microtubule-associated protein 2) was used as neuronal marker (in green) and DAPI to stain the cell nuclei

(in blue). The Fabs detected wtPrP<sup>C</sup> in the cerebellar granule cell layer (CGL) and molecular layer (ML) of wt and *tga20* mice. As expected, the Fabs did not detect wtPrP<sup>C</sup> in Purkinje cell layer (PCL) of *tga20* mice. The higher staining intensity of Fab71 might be caused by its ability to recognize the repetitive epitopes within the OR multiple times. Scale bar: 20  $\mu$ m.

**Appendix Fig. S4: Medical and demographic data of the hospital cohort screened for anti-PrP antibodies and of the hits identified in the primary screening.**

**(A)** Bar plot indicating the hospital departments from which the tested 37,894 samples were obtained.

**(B,C)** Correlations between  $-\log(\text{EC50})$  and age (B),  $-\log(\text{EC50})$  and sex (C). Black dots in panels (B) and (C) indicate each of the 27 hits that were identified in the primary screen.

Data information: The boxplot divides the data set into three quartiles. The box extends from the first to the third quartile values of the data set, with a line at the median. The whiskers extend from the box to show the range of the data (minimum and maximum).

**Appendix Table S1: Matrix of the different washing conditions during panning**

| <b>Washing time</b>              | <b>A1 (standard)</b> | <b>A2 (high salt)</b> | <b>A3 (detergent)</b>                     |
|----------------------------------|----------------------|-----------------------|-------------------------------------------|
| 5 times quick,<br>10 times 5 min | PBST                 | PBST + 1M NaCl        | PBS + 2% Octyl $\beta$ -D-glucopyranoside |
| 5 times quick,<br>7 times 5 min  | PBS                  | PBS + 1M NaCl         | PBS + 2% Octyl $\beta$ -D-glucopyranoside |
| 3 times 5 min                    | PBS                  | PBS                   | PBS                                       |



**Appendix Table S2: Criteria for sorting the NGS counts for epitope prediction of the anti-PrP Fabs**

| Panning output NGS libraries  |             |        |     |                          |                                    |                                     |                         |                         |                       |                       |                           |                          |                          |                           |             |
|-------------------------------|-------------|--------|-----|--------------------------|------------------------------------|-------------------------------------|-------------------------|-------------------------|-----------------------|-----------------------|---------------------------|--------------------------|--------------------------|---------------------------|-------------|
| mouse PrP amino acid residues | PrP domains |        | Ref | binding strength         |                                    | synthetic biotinylated PrP peptides |                         |                         |                       |                       | recombinant PrP fragments |                          |                          | negative controls         |             |
|                               |             |        |     | recPrP <sub>23-231</sub> | recPrP <sub>23-231</sub> high salt | recPrP <sub>23-231</sub> detergent  | CC1 <sub>23-50</sub> SP | CC1 <sub>23-50</sub> LP | N-OR <sub>39-66</sub> | F-OR <sub>51-91</sub> | CC2-HC <sub>92-120</sub>  | recPrP <sub>23-110</sub> | recPrP <sub>90-231</sub> | recPrP <sub>121-231</sub> | Neutravidin |
| 23-38                         | CC1         | CC1_SP | 1   | ns                       | ns                                 | >0                                  | ns                      | 0                       | 0                     | 0                     | >0                        | 0                        | 0                        | 0                         | 0           |
|                               |             | CC1_LP | 1   | ns                       | ns                                 | ns                                  | >0                      | 0                       | 0                     | 0                     | >0                        | 0                        | 0                        | 0                         | 0           |
| 39-50                         | CC1-N-OR    |        | 1   | ns                       | ns                                 | ns                                  | ns                      | >0                      | 0                     | 0                     | >0                        | 0                        | 0                        | 0                         | 0           |
| 50-66                         | N-OR        |        | 1   | ns                       | ns                                 | 0                                   | 0                       | >0                      | ns                    | 0                     | >0                        | 0                        | 0                        | 0                         | 0           |
| 51-91                         | F-OR        |        | 1   | ns                       | ns                                 | 0                                   | 0                       | ns                      | >0                    | 0                     | >0                        | 0                        | 0                        | 0                         | 0           |
| 92-110                        | CC2-HC      |        | 1   | ns                       | ns                                 | 0                                   | 0                       | 0                       | 0                     | >0                    | >0                        | >0                       | 0                        | 0                         | 0           |
| 111-120                       | CC2-HC      |        | 1   | ns                       | ns                                 | 0                                   | 0                       | 0                       | 0                     | >0                    | 0                         | >0                       | 0                        | 0                         | 0           |
| 90-231                        | CC2-GD      |        | 1   | ns                       | ns                                 | 0                                   | 0                       | 0                       | 0                     | 0                     | 0                         | >0                       | >0                       | 0                         | 0           |
| 121-231                       | GD          |        | 1   | ns                       | ns                                 | 0                                   | 0                       | 0                       | 0                     | 0                     | 0                         | 0                        | >0                       | 0                         | 0           |

Ref: reference panning to recPrP<sub>23-231</sub>

CC1\_SP: CC1 Solid Phase

CC1\_LP: CC1 Liquid Phase

ns: not selected

**Appendix Table S3: EC<sub>50</sub> of Fab3 and Fab71 and their respective affinity matured variants as determined by ELISA**

|              | <b>EC<sub>50</sub> (nM)</b> | <b>R square</b> |
|--------------|-----------------------------|-----------------|
| <b>Fab3</b>  | 30.430                      | 0.965           |
| <b>Fab81</b> | 0.184                       | 0.987           |
| <b>Fab82</b> | 0.298                       | 0.984           |
| <b>Fab83</b> | 0.044                       | 0.982           |
| <b>Fab84</b> | 0.530                       | 0.990           |
| <b>Fab85</b> | 0.465                       | 0.989           |
| <b>Fab86</b> | 0.541                       | 0.981           |
| <b>Fab87</b> | 0.385                       | 0.991           |
| <b>Fab88</b> | 0.474                       | 0.989           |
| <b>Fab89</b> | 0.421                       | 0.993           |
| <b>Fab90</b> | 0.235                       | 0.961           |
| <b>Fab91</b> | 0.450                       | 0.984           |
| <b>Fab92</b> | 0.260                       | 0.992           |
| <b>Fab93</b> | 0.518                       | 0.989           |
| <b>Fab94</b> | 0.210                       | 0.992           |
| <b>Fab95</b> | 0.511                       | 0.994           |
| <b>Fab96</b> | 1.516                       | 0.987           |
| <b>Fab97</b> | 0.322                       | 0.977           |
| <b>Fab98</b> | 1.005                       | 0.990           |
| <b>Fab99</b> | 1.119                       | 0.995           |

|               | <b>EC<sub>50</sub> (nM)</b> | <b>R square</b> |
|---------------|-----------------------------|-----------------|
| <b>Fab71</b>  | 24.890                      | 0.992           |
| <b>Fab100</b> | 0.232                       | 0.983           |
| <b>Fab101</b> | 0.190                       | 0.964           |
| <b>Fab102</b> | 0.238                       | 0.981           |
| <b>Fab103</b> | 0.266                       | 0.976           |
| <b>Fab104</b> | 0.380                       | 0.958           |

**Appendix Table S4: Features and clinical data of the subjects displaying high titre of anti-PrP autoantibodies in the plasma.**

| Patient ID  | Core diagnoses                                                                                  | Sex    | Year of birth |
|-------------|-------------------------------------------------------------------------------------------------|--------|---------------|
| Patient_01  | Valvular and coronary heart disease; chronic obstructive pulmonary disease                      | Male   | 1943          |
| Patient_02  | Contusion of digit                                                                              | Female | 1971          |
| Patient_03  | Chronic lymphatic leukaemia; valvular cardiac disease; chronic kidney insufficiency; oncocytoma | Male   | 1937          |
| Patient_04  | Not shown                                                                                       |        |               |
| Patient_05  | Myeloid leukaemia                                                                               | Male   | 1959          |
| Patient_06  | Aortic stenosis                                                                                 | Male   | 1947          |
| Patient_07  | Not shown                                                                                       |        |               |
| Patient_08  | Aortic aneurysm and dissection                                                                  | Male   | 1937          |
| Patient_09  | Ulcerating colitis; drug abuse                                                                  | Female | 1970          |
| Patient_010 | Not shown                                                                                       |        |               |
| Patient_014 | HIV infection; erectile dysfunction; gonarthrosis                                               | Male   | 1959          |
| Patient_015 | Intraspinal space-consuming lesion (ganglioneurom WHO grade I); drug abuse                      | Male   | 1985          |
| Patient_016 | Coronary heart disease; severe kidney insufficiency; hypothyreosis                              | Female | 1959          |
| Patient_017 | Polyserositis; mamma carcinoma                                                                  | Female | 1958          |
| Patient_018 | HIV infection                                                                                   | Male   | 1991          |
| Patient_019 | Not shown                                                                                       |        |               |
| Patient_020 | Urothel carcinoma; adenocarcinoma; arrhythmogenic cardiac disease                               | Male   | 1936          |
| Patient_021 | Coronary 2-vessel disease                                                                       | Male   | 1954          |
| Patient_022 | Coronary heart disease; neuropathic pain                                                        | Male   | 1935          |
| Patient_023 | T cell lymphoma                                                                                 | Male   | 1967          |
| Patient_024 | Injury of the pelvic ring                                                                       | Male   | 1964          |
| Patient_025 | Status epilepticus; myxofibrosarcoma; slight dementia type Alzheimer's disease                  | Female | 1931          |
| Patient_026 | Squamos cell carcinoma                                                                          | Female | 1941          |
| Patient_027 | Not shown                                                                                       |        |               |
| Patient_028 | Syncope; severe depressive episodes                                                             | Female | 1985          |
| Patient_029 | Not shown                                                                                       |        |               |
| Patient_030 | Adenocarcinoma; signs of dementia                                                               | Male   | 1937          |

Shown are the core diagnoses, the sex, and the year of birth for the 21 out of 27 individuals identified with autoantibodies against recombinant PrP in the high-throughput antibody profiling. We have refrained from displaying any patient-associated information from patients who do not gave expressive consent by signing the hospital-wide general consent of the University Hospital of Zurich. While many but not all of the patients included here are highly multimorbid, only the core diagnoses were selected for display, also with respect to the appropriate handling of sensitive patient data.

**Appendix Table S5: Comparison of age, gender and clinical data between subjects with and without high titre PrP autoantibodies.**

| Median age hits | # hits | Median age non-hits | # non-hits | P-value  |
|-----------------|--------|---------------------|------------|----------|
| 61              | 27     | 55                  | 48691      | 3.58E-02 |

| % male hits | % female hits | % male non-hits | % female non-hits | P-value  |
|-------------|---------------|-----------------|-------------------|----------|
| 66.67       | 33.33         | 52.42           | 47.64             | 1.96E-01 |

| ICD-10 code | # hits | # non-hits | # hits | # non-hits | P-value  | Bonferroni |
|-------------|--------|------------|--------|------------|----------|------------|
| E87         | 6      | 4830       | 22.22  | 9.92       | 4.56E-02 | 1.82E-01   |
| I25         | 7      | 6207       | 25.93  | 12.75      | 7.33E-02 | 2.93E-01   |
| I10         | 9      | 11595      | 33.33  | 23.81      | 2.59E-01 | 1          |
| N18         | 5      | 5874       | 18.52  | 12.06      | 3.76E-01 | 1          |

Statistical testing for difference in age (median test, significance at  $\alpha \leq 0.01$ ) or gender (chi-square test, significance at  $\alpha \leq 0.01$ ) revealed no significant difference. Analysis of enriched ICD-10 codes in patients with anti-PrP-autoantibodies versus patients without. No patterns could be discerned and no ICD-10 code reached a statistically significant enrichment (chi-square test, significance at  $\alpha \leq 0.01$ , Bonferroni correction for multiple comparisons).

**Appendix Table S6: exact *p*-values**

| <b>Figure panel</b> | <b>comparison</b>                                                                        | <b><i>p</i>-value</b> |
|---------------------|------------------------------------------------------------------------------------------|-----------------------|
| <b>Figure 3C</b>    | NBH: untreated vs Fab 25                                                                 | 0.000683              |
|                     | Prion: untreated vs Fab83                                                                | 0.001199              |
|                     | Prion: untreated vs Fab8                                                                 | 3.6E-14               |
|                     | Prion: untreated vs Fab44                                                                | 6.67E-12              |
|                     | Prion: untreated vs Fab71                                                                | 9.89E-10              |
|                     | Prion: untreated vs Fab100                                                               | 7.16E-10              |
| <b>Figure 3D</b>    | untreated vs Fab100                                                                      | 0.003309              |
| <b>Figure EV3C</b>  | CAD5-Prnp <sup>-/-</sup> non transfected vs WtPrPC                                       | 0.0001                |
|                     | CAD5-Prnp <sup>-/-</sup> non transfected vs PrP $\Delta$ 23-31                           | 0.006                 |
|                     | CAD5-Prnp <sup>-/-</sup> non transfected vs PrP $\Delta$ 23-27                           | 0.0148                |
|                     | CAD5-Prnp <sup>-/-</sup> non transfected vs [[PrP]] <sub>(23-27)</sub> <sup>(K→A)</sup>  | 0.0001                |
|                     | CAD5-Prnp <sup>-/-</sup> non transfected vs [[PrP]] <sub>(23-27)</sub> <sup>Mirror</sup> | 0.0025                |
| <b>Figure EV5A</b>  | Prion vs Prion + Fab71                                                                   | 0.001173              |
| <b>Figure EV5B</b>  | Prion vs Prion + Fab100                                                                  | 0.019613              |
