# Supplementary material for: Protective anti‐prion antibodies in human immunoglobulin repertoires
Source: PubMed Central journal article supplement (PMC7506995; doi:10.15252/emmm.202012739), 2020-08-10
Supplement: EMMM-12-e12739-s002.pdf [file EMMM-12-e12739-s002.pdf]

## Expanded View Figures

### Figure EV1. Selection strategy to identify anti-PrP Fabs from a synthetic human Fab phage library and rescue of NGS-identified Fab clones.

- A RecPrP<sub>23-231</sub> (blue boxes) was used as target for the first and second round of panning. In the third round, selected phages were panned against recPrP<sub>23-231</sub>, recPrP<sub>23-231</sub> under different washing conditions, recPrP fragments (red boxes) and peptides (green boxes) to select for Fabs targeting specific regions of PrP. The DNA preparation from the selected phages was used for NGS of the HCDR3 or ELISA. Negative controls: BSA and Neu (gray boxes).
- B Bar plot of the NGS counts, relative to recPrP<sub>23-231</sub>, for the indicated HCDR3 sequence.
- C PCR strategy to retrieve the clone of interest. Specific HCDR3\_Rw and HCDR3\_Fw primers (red arrows) were designed as complementary to the sequence to be rescued. In two separate PCR reactions, the HCDR3\_Rw primer was used in combination with the PaL\_Fw primer (blue arrow) annealing upstream of the VL, whereas the HCDR3\_Fw primer was used in combination with the Flag\_RW primer annealing to the His-tag sequence (blue arrow). The two amplicons were then assembled in a second PCR reaction resulting in the full Fab sequence.
- D The retrieved Fab clone (FabRTV) was expressed in *E. coli* and purified by IMAC. The purity of the Fab was analyzed by SDS-PAGE.
- E FabRTV was tested for its binding specificity to recPrP<sub>23-231</sub> and the indicated PrP fragments and peptides by ELISA. As determined by the NGS analysis (B) and given as an example, FabRTV binds to CC2-HC<sub>92-120</sub>.

Data information: ELISA data were performed in duplicates. Data represent the mean  $\pm$  sem.

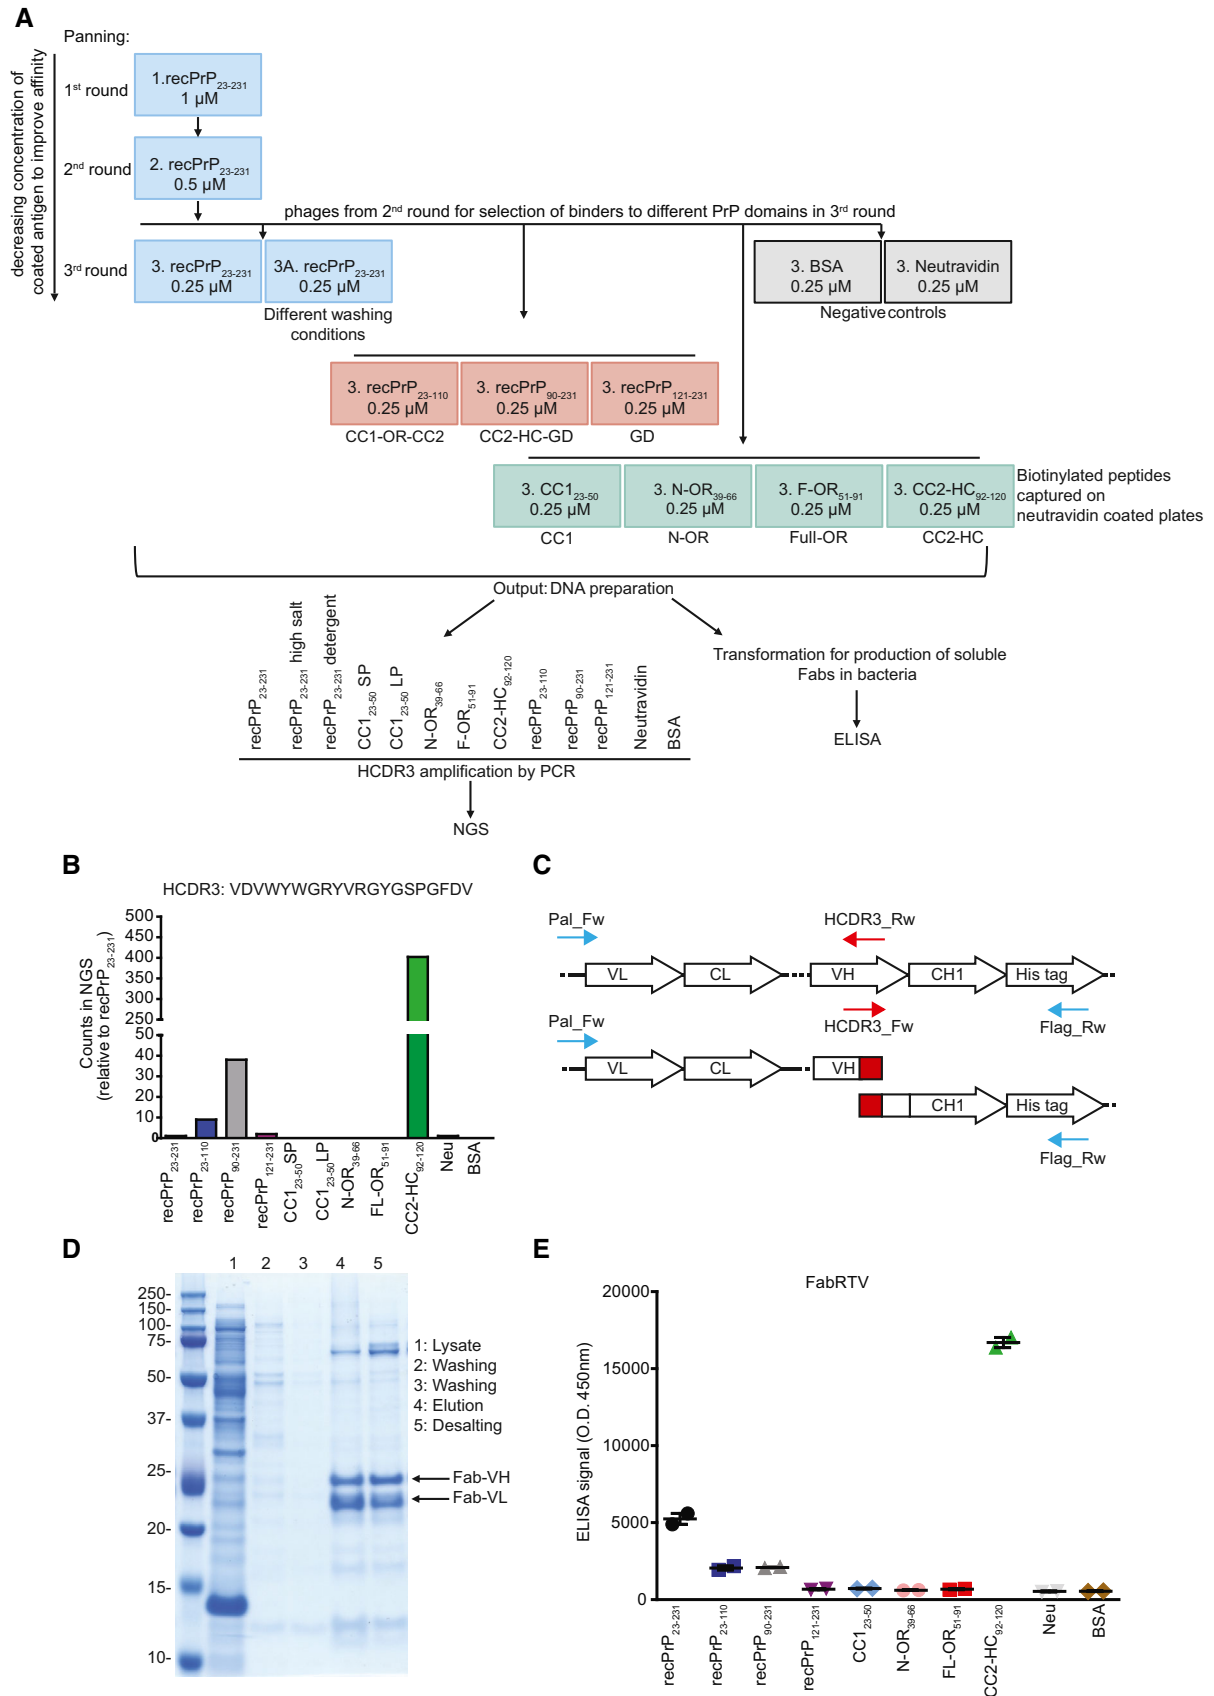

Figure EV1.

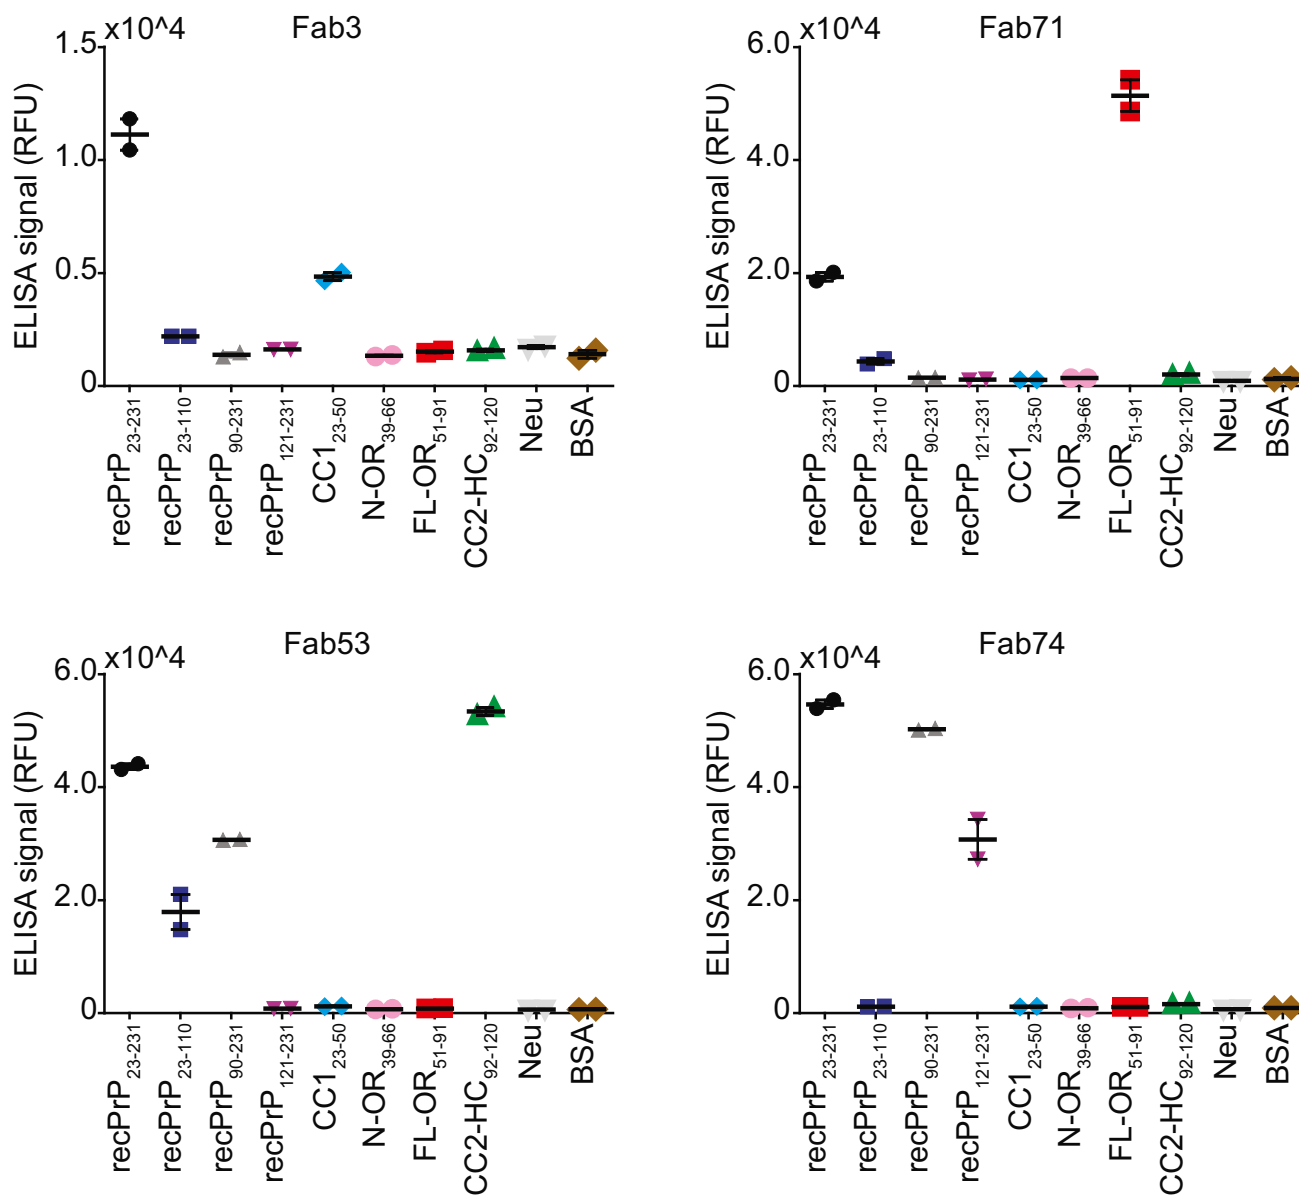

**Figure EV2. Binding specificity of the retrieved anti-PrP Fabs.**

ELISA signal (relative fluorescence units, RFU) indicating the binding reactivity of selected, purified anti-PrP Fabs to mouse recPrP<sub>23-231</sub>, mouse recPrP fragments and selected N-terminal PrP peptides. Negative controls: Neu and BSA. Fab3: CC1<sub>23-50</sub> binder; Fab71: OR<sub>51-91</sub> binder; Fab53: CC2-HC<sub>92-120</sub> binder; Fab74: GD binder. Data information: ELISA data were performed in duplicates. Data represent the mean ± sem.

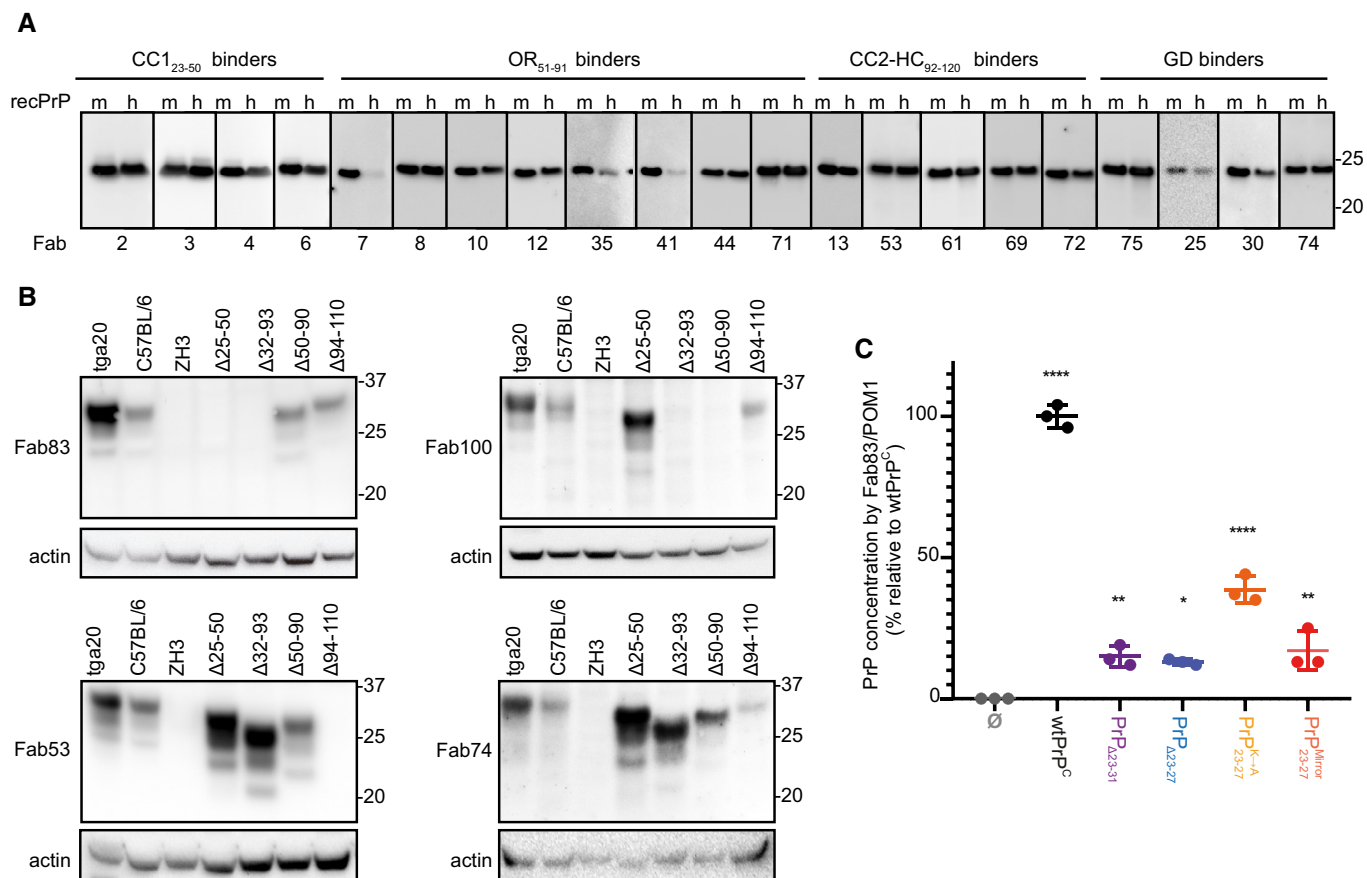

**Figure EV3. Validation of the reactivity of the anti-PrP Fabs by Western blot, ELISA, and immunoprecipitation.**

A, B Western blot analysis to compare the reactivity of the indicated Fabs to mouse (m) recPrP<sub>23-231</sub> and human (h) recPrP<sub>23-230</sub> (A) and to full-length and truncated PrP<sup>c</sup> in BHDs of various mouse lines. Actin was used as loading control (B).

C ELISA to compare the efficiency of Fab83 and POM1 to detect and quantify wt and mutant PrP<sup>c</sup> levels in CAD5-*Pmp*<sup>-/-</sup> cells transfected either with wt or mutant PrP<sup>c</sup> (deletion mutants PrP<sup>Δ23-31</sup> or PrP<sup>Δ23-27</sup>; PrP<sup>K→A</sup><sub>23-27 with lysine residues 23, 24, and 27 replaced by alanine; PrP<sup>Mirror</sup><sub>23-27 with KKRPK exchanged to KPRPK). All concentrations (% relative to wtPrP<sup>c</sup>) were determined by interpolating the ELISA signal to a standard curve of mouse recPrP<sub>23-231</sub>.</sub></sub>

Data information: ELISA data were performed in triplicates. Data represent the mean ± sem. Two-way ANOVA with Dunnett *post hoc* test: \**P* < 0.05; \*\**P* < 0.01; \*\*\*\**P* < 0.0001. *n* = 3 technical replicates.

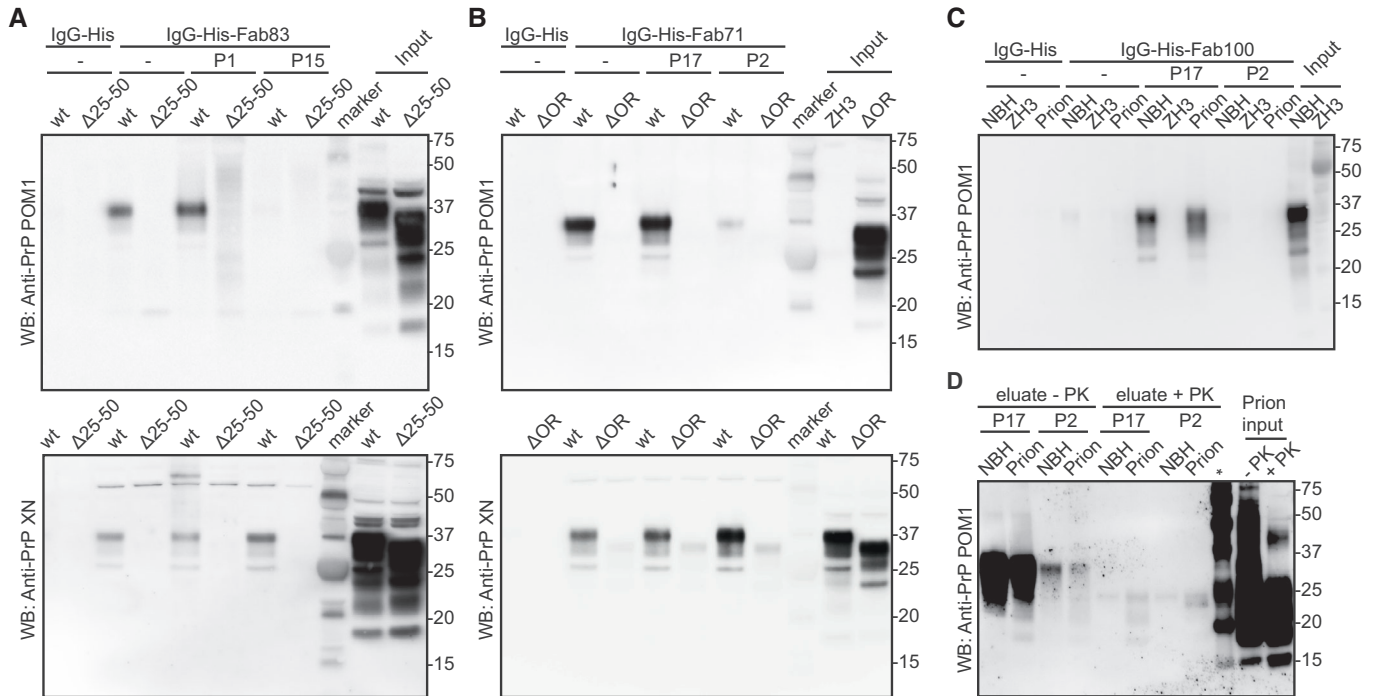

**Figure EV4. Validation of the reactivity of the anti-PrP Fabs by immunoprecipitation.**

- A Fab83 coupled beads immunoprecipitated wtPrP<sup>C</sup> from NBH, but not from BH of PrP $\Delta$ 25–50 mice lacking the respective epitope. WtPrP<sup>C</sup> specifically eluted by competition with the Fab83 epitope-targeting peptide P1 (residues 23–34), but not with the unrelated peptide P15 (top panel). Elution with a SDS buffer was used as nonspecific control (lower panel). Control: IgG-His. Molecular sizes are presented in kDa.
- B Same as (A), but for Fab71 coupled beads which immunoprecipitated wtPrP<sup>C</sup> from NBH, but not from BHs of PrP $\Delta$ OR mice. WtPrP<sup>C</sup> specifically eluted with the epitope-targeting peptide P17 (residues 55–66), but not with the unrelated peptide P2 (top panel).
- C IgG-His-Fab100 coupled beads efficiently immunoprecipitated wtPrP<sup>C</sup> from non-infectious brain homogenate (NBH) and total wtPrP from brains of prion-infected mice (prion), but not from brains of *Prnp*<sup>ZH3/ZH3</sup> (ZH3) mice. WtPrP was eluted by competition with the epitope-targeting peptide P17, but not with the unrelated peptide P2. Eluates were visualized by Western blotting. Control: IgG-His. Molecular sizes are presented in kDa.
- D Same as (C) for NBH and prion to confirm the specific immunoprecipitation and detection of PrP<sup>Sc</sup> with the peptide P17 from brains of prion-infected mice. +PK: digested with PK; –PK: non-digested with PK; \*: molecular weight markers.

**Figure EV5. TR-FRET for the detection of wtPrP<sup>Sc</sup> in prion-infected CAD5 *Prnp*<sup>+/+</sup> after treatment with a panel of Fabs.**

- A TR-FRET for the detection of PrP<sup>Sc</sup> in prion-infected CAD5 *Prnp*<sup>+/+</sup> cells after treatment with selected anti-PrP Fabs. Treatment of the cells with Fab71 (OR<sub>51-91</sub>), but not with Fab3 (CC<sub>123-50</sub>) or Fab29 (GD), significantly reduced PrP<sup>Sc</sup> levels compared to untreated, prion-infected cells.
- B Treatment of prion-infected CAD5 *Prnp*<sup>+/+</sup> cells with Fab100 (OR<sub>51-91</sub> binder), but not with Fab83 (CC<sub>123-50</sub> binder), significantly reduced wtPrP<sup>Sc</sup> levels compared to untreated prion-infected CAD5 *Prnp*<sup>+/+</sup> cells. The dilution range ( $3 \times 10^{-5}\%$  to 1% w/v) of prion-infected BH is shown on the right site to indicate the linear range of the assay. Negative controls: NBH and CAD5 *Prnp*<sup>-/-</sup> cells. Here and in (A), the FRET signal of untreated CAD5 *Prnp*<sup>-/-</sup> cells was set to zero. The FRET anti-PrP antibody pair POM19-Eu and POM1-APC was used for detection.

Data information: For prion-infected CAD5 *Prnp*<sup>+/+</sup> cells, the assay was performed in biological triplicates represented as four technical replicates for Fab71, Fab3, Fab100, and Fab83. For CAD5 *Prnp*<sup>+/+</sup> cells that were either untreated, exposed to NBH, or treated with Fab29, the assay was performed in biological duplicates represented as four technical replicates. For CAD5 *Prnp*<sup>-/-</sup> cells, one biological replicate was assayed as four technical replicates.  $n = 4-12$ . Each dilution of prion-infected BH is represented in technical duplicates. Data presented in dot plots represent the mean  $\pm$  sem. One-way ANOVA and Bonferroni's multiple comparisons were used for statistical analysis; \* $P < 0.05$ ; \*\* $P < 0.01$ .

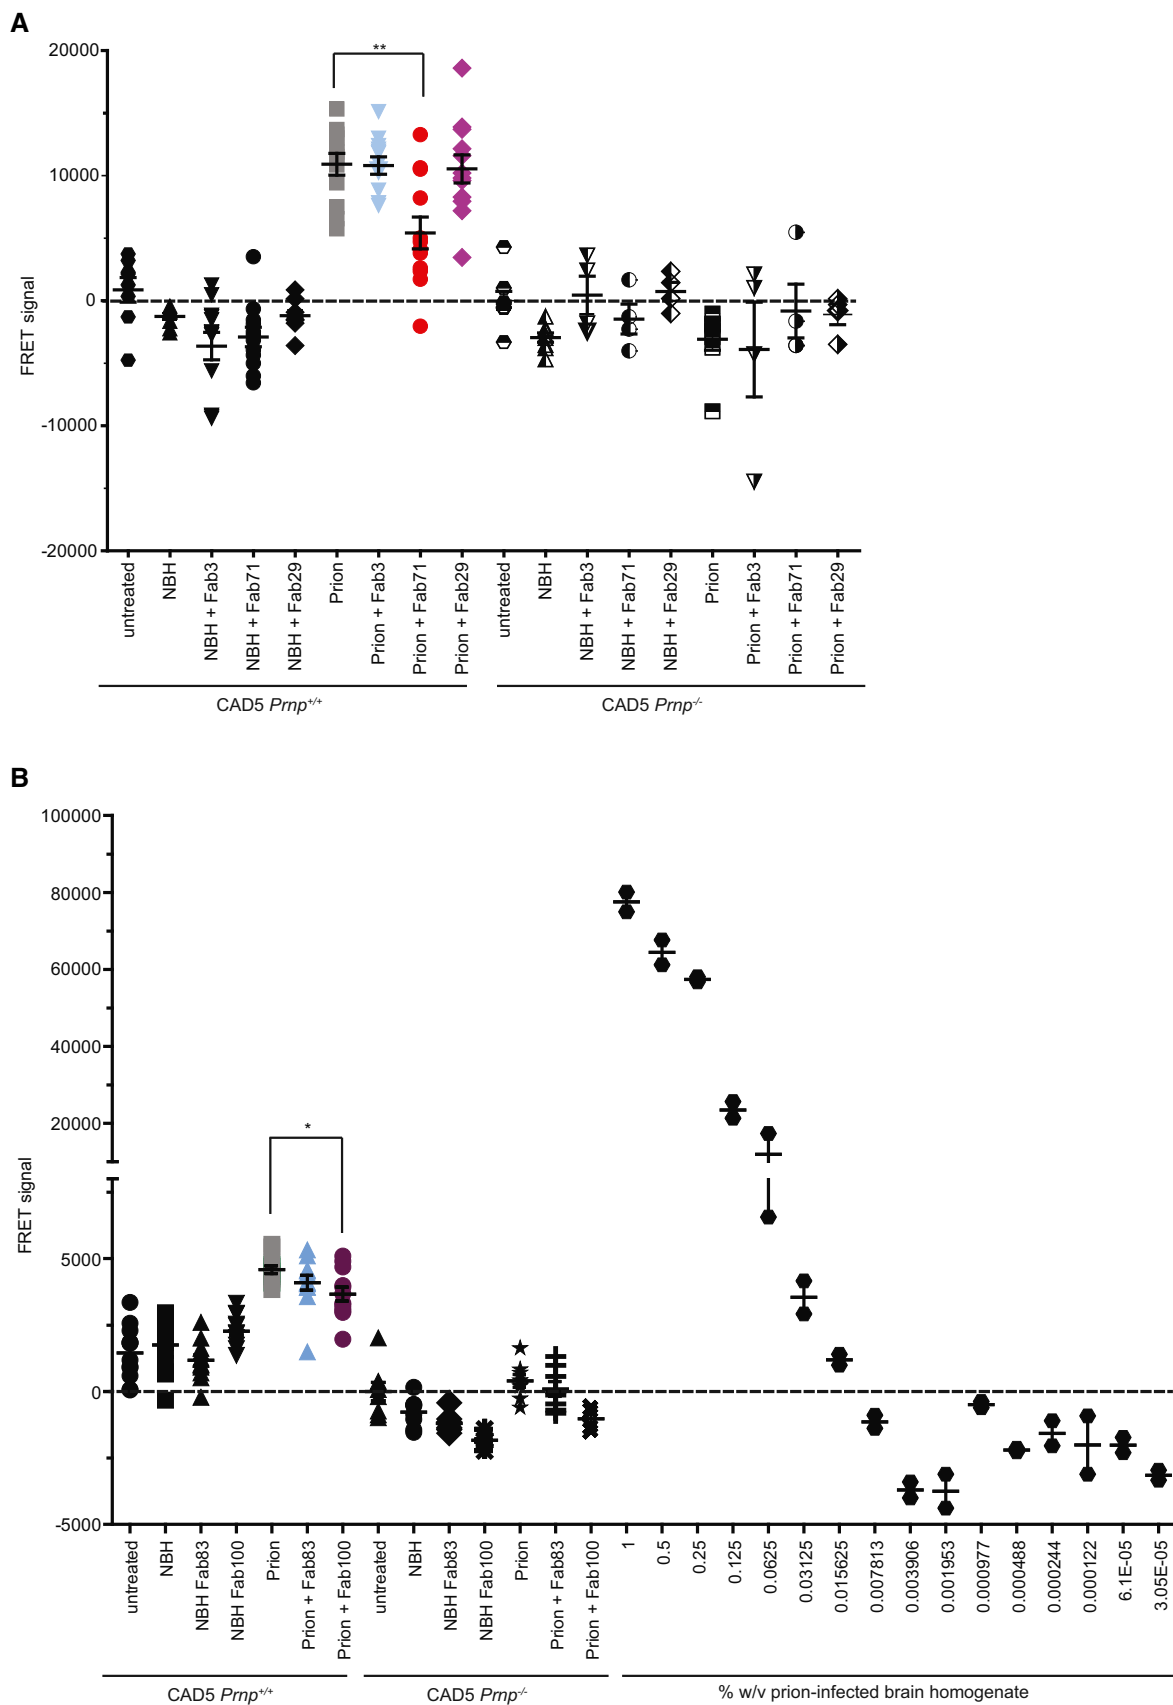

Figure EV5.
