# Supplementary material for: Protective anti‐prion antibodies in human immunoglobulin repertoires
Source: PubMed Central journal article supplement (PMC7506995; doi:10.15252/emmm.202012739), 2020-08-10

**Source Data: Figure 3**

**Figure 3, panel D**

WB of PrP from COCS lysate

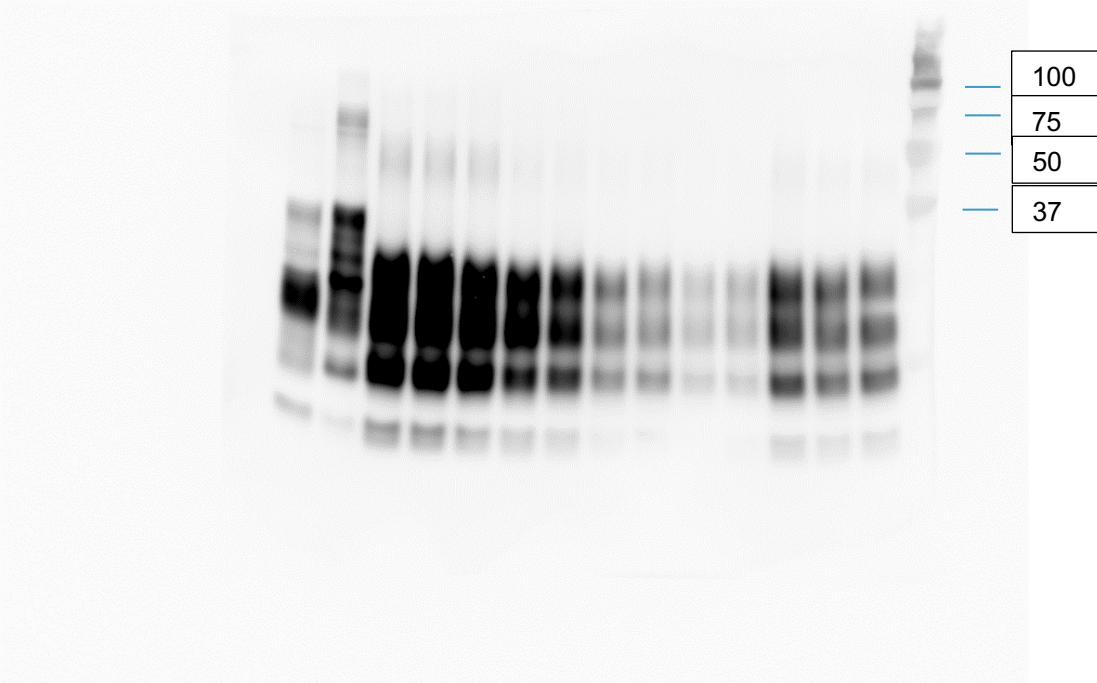

Supplement: EMMM-12-e12739-s004.pdf [file EMMM-12-e12739-s004.pdf]
